# Supplementary material
Source: PubMed Central journal article supplement (PMC5628797)
Supplement: mmc1.pdf [file mmc1.pdf]

YMTHE, Volume 25

## **Supplemental Information**

### **A Fusion Receptor as a Safety Switch, Detection, and Purification Biomarker for Adoptive Transferred T Cells**

**Xiuqi Wu, Bizhi Shi, Jiqin Zhang, Zhimin Shi, Shengmeng Di, Minliang Fan, Huiping Gao, Hai Wang, Jianren Gu, Hua Jiang, and Zonghai Li**

## Supplemental Table

Table S1.

Amino acid sequence of FR806:

maqrmttqlllllvwwavvgeaqtvracgadsyemeedgvrkckkriawartellnvcnakhkhkekgpedklheqcrpwrknaccstnt  
sqeahkdvsylrfnwnhcgemapackrhfiqdtclyecspnlgpwiqqvdqswrkervlnvplckedceqwwedcrtstcksnwhkg  
wnwtsfgnkcavgaacqpfhfyfptptvlcneiwithsykvsnsyrgsgrciqmwfpaqgnpneevarfyaaamsgagpwaawpflslal  
mllwlls

Ribosomal skipping sequence (F2A):

vkqtlndllklagdvsnpgp

Amino acid sequence of anti-CD19 CAR:

malpvtalllplalllhaarpdilqtqspaslavslgqratisckasqsvdydgdsylnwyqqipgppklliidasnlvsqipprfsgsgstfdln  
ihpvekvaatyhcqqstedpwtfggkgleikgggsgggsgggsgvqlqqsgaelvrpgssvkisckasgyafssywmnwvkqrrp  
qglewigqiwpgdgdtnyngkfkgtatltadesstaymqslsasedsavyfcarretttvgryyyamdywgqgttvtssttpaprpptpap  
tiasqplslrpeacrpaagavhtrgldfacdiywaplgtcgvllslvitlyckrgrklllyifkqpfmrpvqttqeedgcscrfpееееggcelr  
vkfsrsadapayqqgnqlynelnlgrreeydvldkrrgrdpemggkpqrrknpqeglynelqkdkmaeayseigmkgerrrgkghdglyq  
glstatkdydalhmqalppr

## Supplemental Figures

Figure S1:

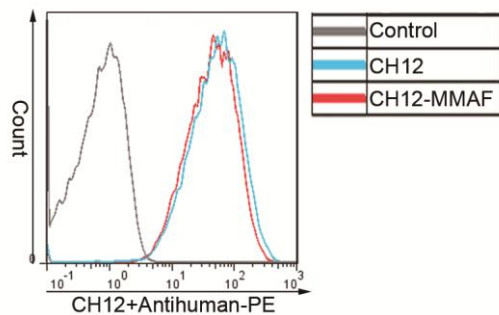

**Figure S1: CH12 and CH12-MMAF stained FR806<sup>+</sup> T-cells with equal intensity.** T cells transduced with FR806 were stained with CH12 and CH12-MMAF at the concentration of 10 $\mu$ g/ml followed by goat anti-human IgG-PE. The grey line shows staining with an isotype IgG antibody followed by goat anti-human IgG-PE.

Figure S2:

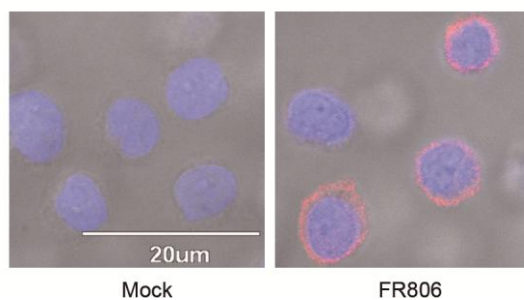

**Figure S2: Confocal microscopy confirmed the internalization of CH12-MMAF into FR806<sup>+</sup> T-cells.** FR806<sup>+</sup> T-cells were treated with CH12-MMAF for 4h at 37 $^{\circ}$ C. After fixation and permeabilization, the cells were stained with a PE-conjugated secondary antibody and DAPI. Scale bar

represents 20  $\mu\text{M}$ .

Figure S3:

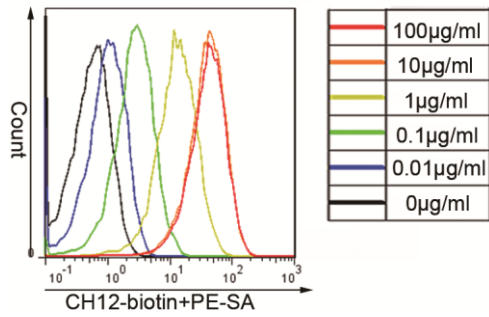

**Figure S3: Titration of biotinylated CH12.** FR806<sup>+</sup> T cells were incubated with biotinylated CH12 at the indicated concentrations and subsequently labeled with the secondary antibody streptavidin-PE.

Figure S4:

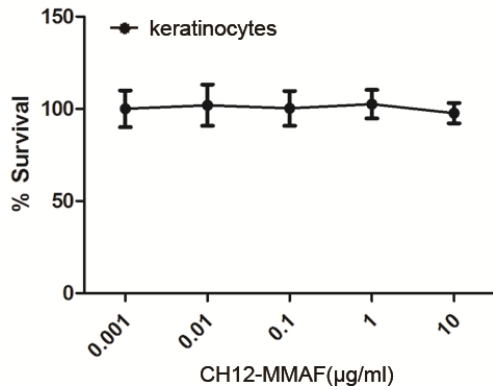

**Figure S4: Cytotoxicity of CH12-MMAF to keratinocytes.** Keratinocytes were exposed to various concentrations of CH12-MMAF for 72h followed by a cell viability assay. Percentage survival (mean  $\pm$ SD) of triplicate wells is depicted.
